# Supplementary material
Source: PubMed Central journal article supplement (PMC4014277)
Supplement: supp_M113.034215_mcp.M113.034215-1.pdf [file supp_M113.034215_mcp.M113.034215-1.pdf]

**Supplemental Table S1.** Fatty acid composition of mature seeds harvested from plants grown under Control, LS70, LS53, or LS32 conditions.

|         | Fatty acid composition (mg g <sup>-1</sup> DW) |                 |                 |                   |                  |                  |            |                 |                 |        |
|---------|------------------------------------------------|-----------------|-----------------|-------------------|------------------|------------------|------------|-----------------|-----------------|--------|
|         | C16:0                                          | C16:1           | C18:0           | C18:1             | C18:2 (ω6)       | C18:3 (ω3)       | C20:0      | C20:1           | C22:0           | C22:1  |
|         | palmitic                                       | palmitoleic     | stearic         | oleic             | linoleic         | linolenic        | eicosanoic | gadoleic        | behenic         | erucic |
| Control | 18.3 ±0.2                                      | 1.2 ±0.0        | 7.8 ±0.2        | 264.3 ±4.1        | 87.3 ±1.4        | 46.4 ±1.1        | 2.6 ±0.1   | 5.3 ±0.1        | 1.4 ±0.0        | 0 ±0.0 |
| LS70    | 18.2 ±0.3                                      | 1.2 ±0.0        | 7.9 ±0.1        | 266.2 ±4.8        | 85.6 ±1.3        | 44.3 ±0.8        | 2.7 ±0.1   | 5.4 ±0.1        | 1.5 ±0.0        | 0 ±0.0 |
| LS53    | 18.7 ±0.2                                      | 1.2 ±0.0        | <b>7.2 ±0.1</b> | 256.7 ±1.9        | <b>79.1 ±1.1</b> | <b>41.1 ±0.8</b> | 2.6 ±0.0   | 5.3 ±0.1        | <b>1.6 ±0.0</b> | 0 ±0.0 |
| LS32    | <b>19.4 ±0.4</b>                               | <b>1.5 ±0.0</b> | <b>6.6 ±0.3</b> | <b>178.5 ±4.3</b> | <b>57.3 ±1.2</b> | <b>28.3 ±0.8</b> | 2.6 ±0.0   | <b>3.8 ±0.1</b> | <b>1.6 ±0.0</b> | 0 ±0.0 |

The values are shown as mean ± SE ( $n = 6$  for control,  $n = 4$  for LS70, LS53 and LS32). Significant differences from the control values are indicated in bold ( $p < 0.05$ ).

**Supplemental Table S2.** Significantly changed proteins in LS70, LS53 and LS32 mature seeds assigned to unknown function or unidentified by mass spectrometry.

| Spot n°                 | Protein name | LS70    | LS53    | LS32    | Species   | NCBI accession numbers | log (E value) | CV (%) | Exp. pI | Exp. Mr (kDa) | Theo. pI | Theo. Mr (kDa) |
|-------------------------|--------------|---------|---------|---------|-----------|------------------------|---------------|--------|---------|---------------|----------|----------------|
| <b>Unknown function</b> |              |         |         |         |           |                        |               |        |         |               |          |                |
| 70                      | Unknown      | -1.0    | -1.5 *  | -2.2 ** | <i>At</i> | 15220526               | -14.0         | 30     | 5.8     | 31.3          | 6.22     | 27.29          |
| 112                     | Unknown      | -1.9 ** | -1.4 *  | -1.6 ** | <i>Eh</i> | 312283013              | -14.9         | 18     | 5.4     | 64.0          | 5.61     | 51.79          |
| 123                     | Unknown      | -1.3 ** | -1.3 *  | -1.8 ** | <i>Al</i> | 297791153              | -29.9         | 20     | 5.8     | 34.9          | 7.07     | 27.90          |
| 128                     | Unknown      | 1.7 **  | 1.3 *   | -1.0    | <i>Al</i> | 297816624              | -45.5         | 24     | 5.2     | 89.9          | 5.07     | 89.94          |
| 130                     | Unknown      | -1.1    | -1.2 *  | -1.7 ** | <i>At</i> | 15220526               | -15.2         | 26     | 5.9     | 31.2          | 6.22     | 27.29          |
| 135                     | Unknown      | 1.4     | 1.7 **  | 1.5 **  | <i>Pm</i> | 205830697              | -5.4          | 92     | 5.9     | 27.0          | 5.81     | 1.39           |
| 150                     | Unknown      | 1.3 **  | 1.1     | -1.2    | <i>Eh</i> | 312282237              | -53.1         | 28     | 5.1     | 84.9          | 4.95     | 80.07          |
| 172                     | Unknown      | -1.1    | -1.1    | -1.5 ** | <i>Br</i> | 119720748              | -5.6          | 21     | 6.3     | 17.2          | 5.94     | 17.66          |
| 178                     | Unknown      | -1.5    | -1.4 ** | -1.3 *  | <i>Al</i> | 297842743              | -54.7         | 38     | 5.5     | 49.6          | 5.49     | 42.12          |
| 192                     | Unknown      | 1.2     | -1.2    | -1.3 *  | <i>Al</i> | 297831644              | -25.4         | 10     | 5.8     | 90.9          | 6.58     | 108.47         |
| <b>Unidentified</b>     |              |         |         |         |           |                        |               |        |         |               |          |                |
| 2                       |              | -6.0 ** | -7.3 ** | -1.5    |           |                        |               |        | 5.8     | 58.0          |          |                |
| 3                       |              | -1.1    | -2.2    | -5.9 ** |           |                        |               |        | 8.7     | 42.5          |          |                |
| 15                      |              | 1.6 *   | 1.1     | 3.1 **  |           |                        |               |        | 4.6     | 52.5          |          |                |
| 20                      |              | -1.3    | 1.3     | 2.4 **  |           |                        |               |        | 5.5     | 38.0          |          |                |
| 24                      |              | 1.0     | -1.2    | -3.0 ** |           |                        |               |        | 5.7     | 26.2          |          |                |
| 28                      |              | -1.1    | -1.7    | -2.9 ** |           |                        |               |        | 8.2     | 44.1          |          |                |
| 39                      |              | -1.1    | -1.4 *  | -2.6 ** |           |                        |               |        | 6.3     | 71.7          |          |                |
| 50                      |              | 1.1     | 2.0 **  | 2.4 **  |           |                        |               |        | 5.5     | 40.1          |          |                |
| 60                      |              | -1.1    | 1.5     | 2.1 **  |           |                        |               |        | 5.5     | 38.7          |          |                |
| 67                      |              | -1.0    | 1.1     | 2.2 **  |           |                        |               |        | 6.5     | 43.8          |          |                |
| 78                      |              | 1.3 *   | -1.2    | -1.7 ** |           |                        |               |        | 5.4     | 26.0          |          |                |
| 84                      |              | 1.2     | 1.5     | 2.0 **  |           |                        |               |        | 6.4     | 35.9          |          |                |
| 90                      |              | 1.3     | 1.0     | -1.5 ** |           |                        |               |        | 5.1     | 33.1          |          |                |
| 93                      |              | -1.7 *  | -1.3    | 1.2     |           |                        |               |        | 5.3     | 38.6          |          |                |
| 94                      |              | 1.3     | -1.2    | -1.5 ** |           |                        |               |        | 6.1     | 83.8          |          |                |
| 102                     |              | -1.3    | -1.9 ** | -1.3    |           |                        |               |        | 6.1     | 62.3          |          |                |
| 103                     |              | 1.9 **  | 1.1     | 1.0     |           |                        |               |        | 5.1     | 53.9          |          |                |
| 107                     |              | 1.6 *   | 1.7     | 1.9 **  |           |                        |               |        | 4.4     | 16.3          |          |                |
| 114                     |              | -1.2    | 1.0     | 1.6 **  |           |                        |               |        | 6.7     | 27.5          |          |                |
| 115                     |              | 1.1     | -1.1    | -1.7 ** |           |                        |               |        | 6.4     | 83.4          |          |                |
| 116                     |              | 1.5     | 1.3 *   | 1.8 **  |           |                        |               |        | 5.0     | 59.1          |          |                |
| 119                     |              | -1.8 *  | -1.3    | -1.1    |           |                        |               |        | 6.5     | 68.8          |          |                |
| 126                     |              | 1.0     | 1.1     | 1.8 **  |           |                        |               |        | 6.0     | 50.0          |          |                |
| 134                     |              | -1.5 *  | 1.0     | 1.1     |           |                        |               |        | 5.4     | 37.6          |          |                |
| 146                     |              | 1.1     | 1.7 **  | 1.4     |           |                        |               |        | 6.0     | 24.2          |          |                |
| 149                     |              | 1.3     | 1.4 **  | 1.6 **  |           |                        |               |        | 5.1     | 16.1          |          |                |
| 151                     |              | -1.0    | -1.1    | -1.6 ** |           |                        |               |        | 5.2     | 33.4          |          |                |
| 154                     |              | -1.2    | 1.1     | 1.4 **  |           |                        |               |        | 6.2     | 30.0          |          |                |
| 155                     |              | 1.3     | -1.2 *  | -1.0    |           |                        |               |        | 6.1     | 84.7          |          |                |
| 156                     |              | 1.1     | -1.3 *  | -1.5 ** |           |                        |               |        | 6.3     | 84.5          |          |                |
| 183                     |              | 1.1     | -1.3 *  | 1.2     |           |                        |               |        | 6.1     | 62.5          |          |                |
| 186                     |              | -1.4 ** | -1.0    | 1.0     |           |                        |               |        | 5.4     | 38.4          |          |                |
| 193                     |              | -1.0    | 1.4 *   | 1.3     |           |                        |               |        | 6.4     | 16.6          |          |                |
| 204                     |              | -1.4 ** | -1.1    | -1.0    |           |                        |               |        | 6.7     | 51.7          |          |                |
| 206                     |              | 1.4 *   | 1.3 *   | 1.3 **  |           |                        |               |        | 5.1     | 28.7          |          |                |
| 215                     |              | 1.1     | 1.2 *   | 1.3 **  |           |                        |               |        | 5.1     | 28.0          |          |                |

Proteins up-regulated and down-regulated are marked in red and green, respectively. Significant ANOVA was followed by a Mann–Whitney test ( $p < 0.05$ ) carried out on the normalised spot volumes ( $n = 6$  for control,  $n = 4$  for LS70, LS53 and LS32). Values indicate fold changes in protein abundance in LS seeds compared to control seeds in a linear scale. \*, \*\*: Significant differences from the control were at  $p < 0.05$  or  $p < 0.01$ , respectively. The assigned best–matched protein is listed with the organism in which it was identified and its GenBank protein accession number. The log(Evalue), the percentage of sequence coverage (CV) and experimental (Exp.) and theoretical (Theo.) pI / Mr, obtained are also indicated.
